# Supplementary material for: Evidence that HIV-1 restriction factor SAMHD1 facilitates differentiation of myeloid THP-1 cells
Source: PubMed Central journal article supplement (PMC4660839; doi:10.1186/s12985-015-0425-y), 2015-11-25

**1 day post-PMA**

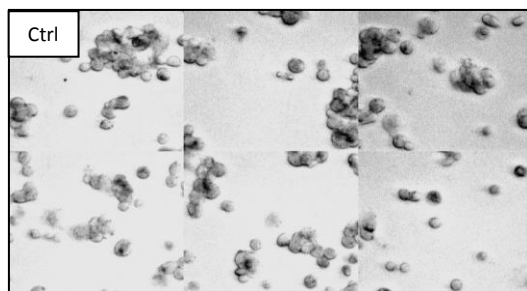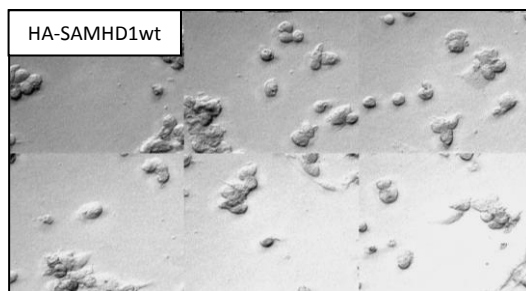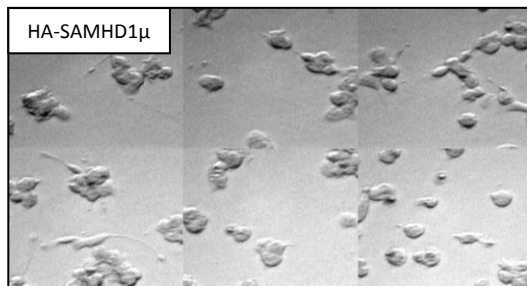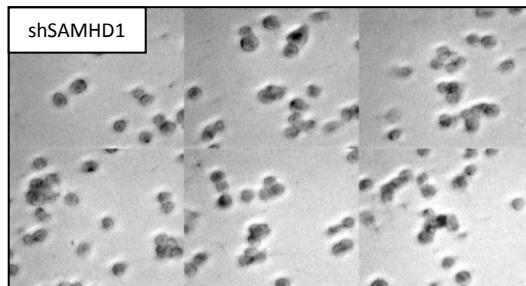

**2 days post-PMA**

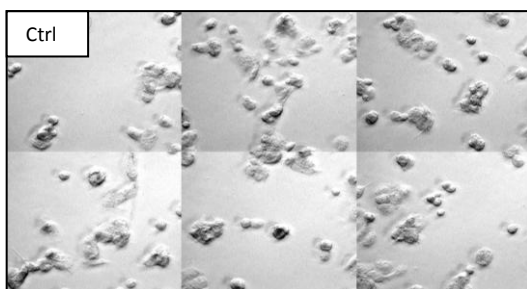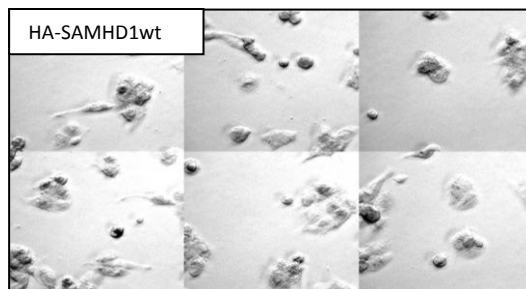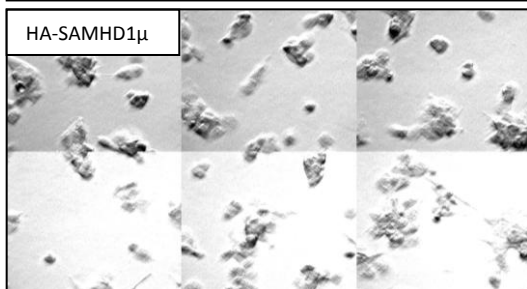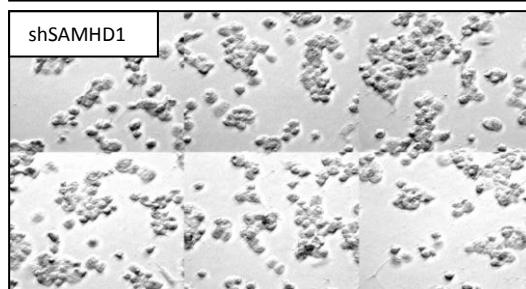

**3 days post-PMA**

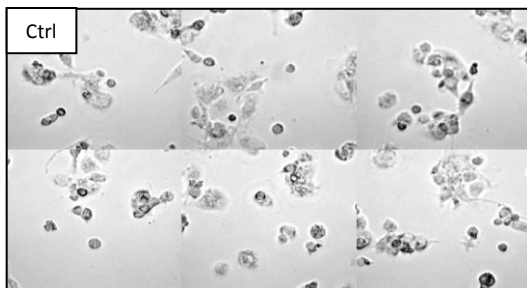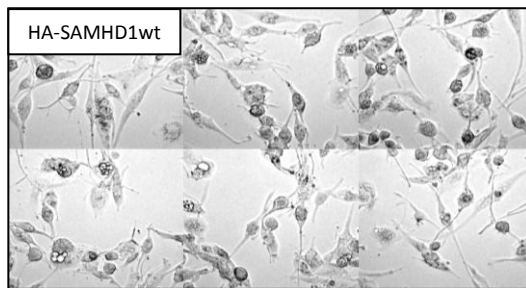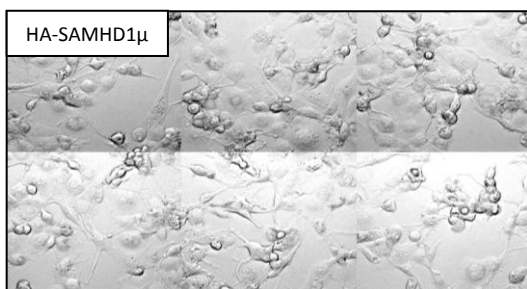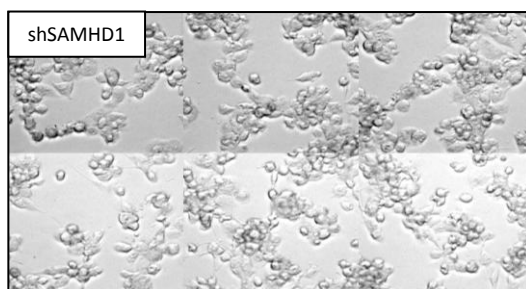

Supplement: 12985_2015_425_MOESM2_ESM.pdf [file 12985_2015_425_MOESM2_ESM.pdf]
