# Supplementary material for: Evidence that HIV-1 restriction factor SAMHD1 facilitates differentiation of myeloid THP-1 cells
Source: PubMed Central journal article supplement (PMC4660839; doi:10.1186/s12985-015-0425-y), 2015-11-25
Supplement: 12985_2015_425_MOESM3_ESM.pdf [file 12985_2015_425_MOESM3_ESM.pdf]

**A**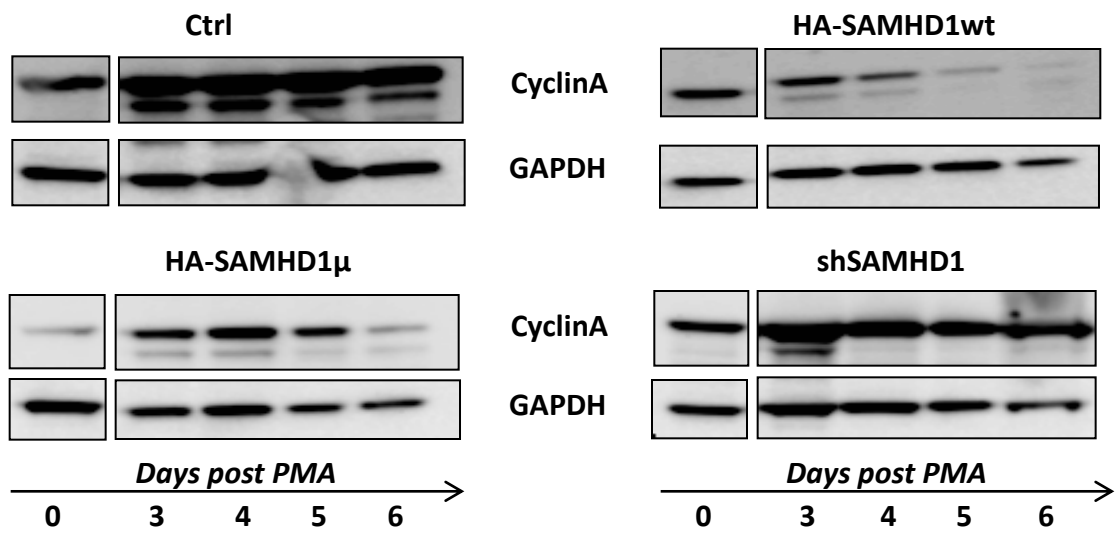**B****CyclinA relative expression (%)**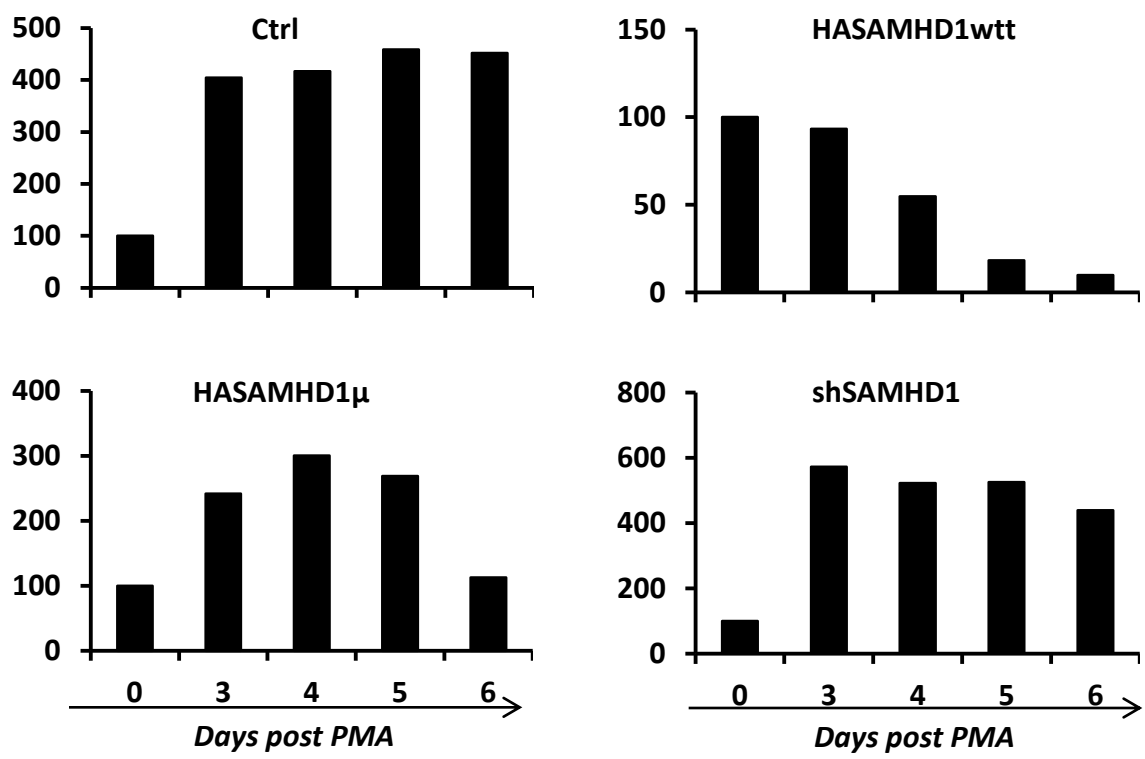**Supplementary Figure 3**
