# Supplementary material for: Evidence that HIV-1 restriction factor SAMHD1 facilitates differentiation of myeloid THP-1 cells
Source: Springer Nature journal article supplement (doi:10.1186/s12985-015-0425-y), 2015-11-25

**A**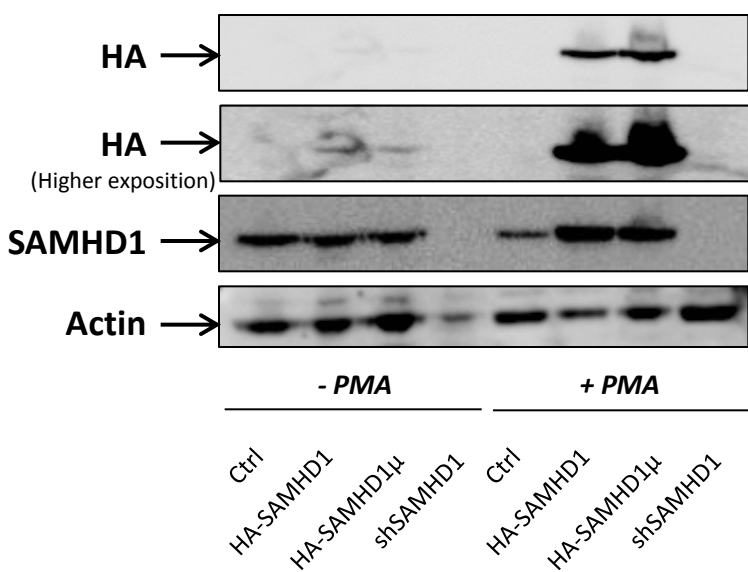**B**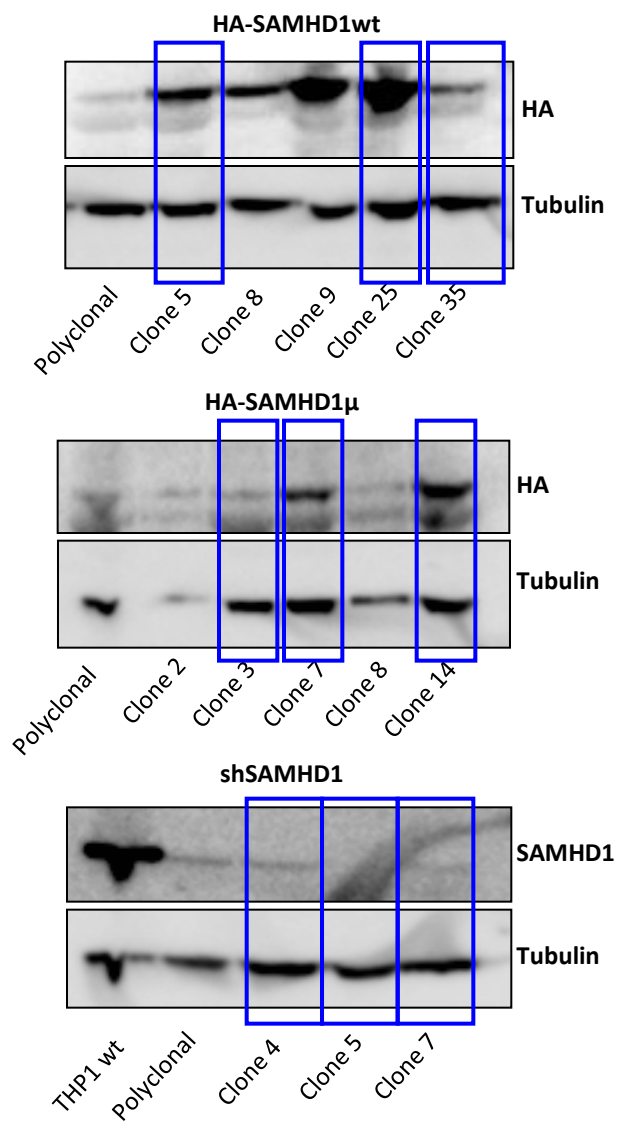

Supplement: MOESM1 [file 9770440]
